# Supplementary material
Source: ML conference proceedings conference paper supplement (https://openreview.net/forum?id=tT9t_ZctZRL)

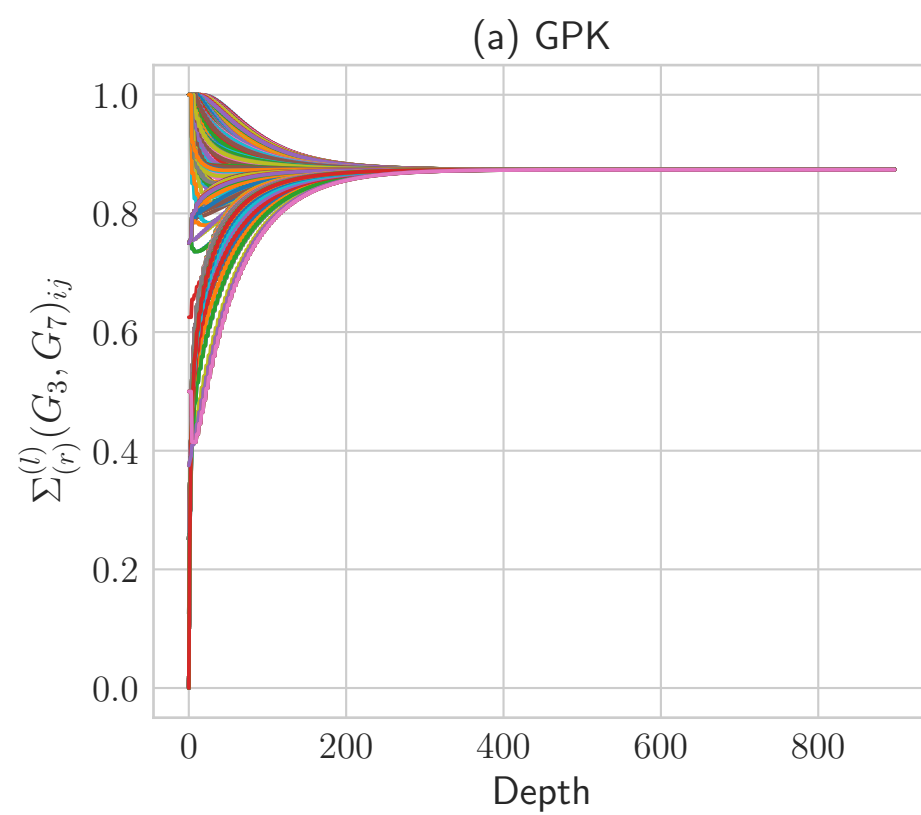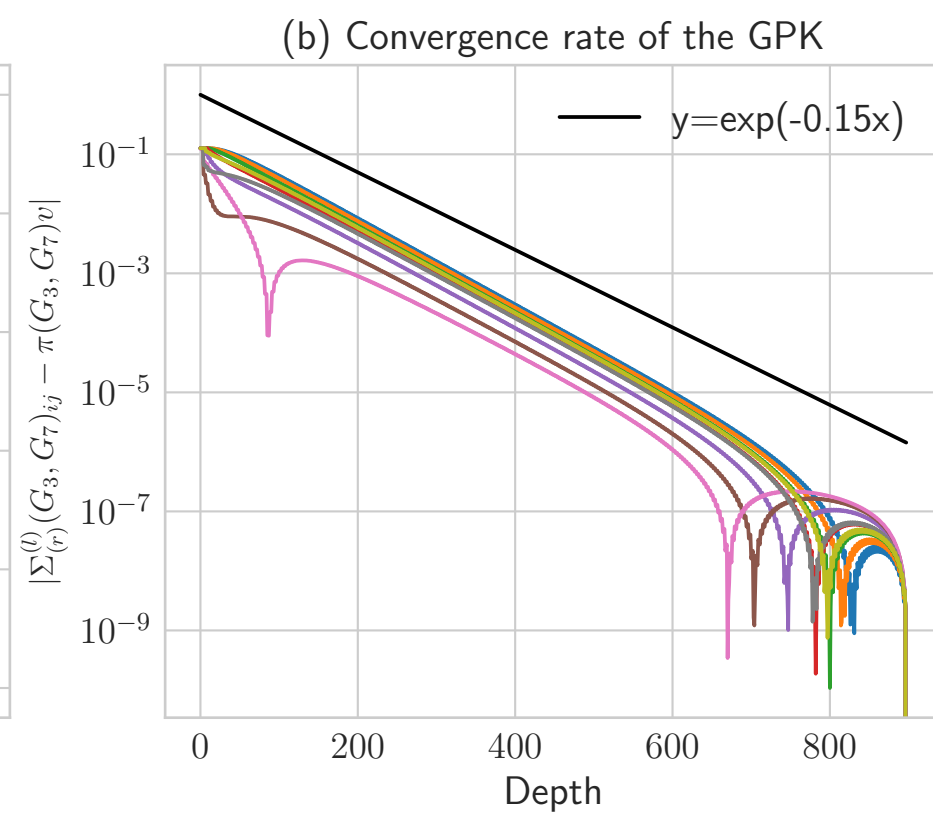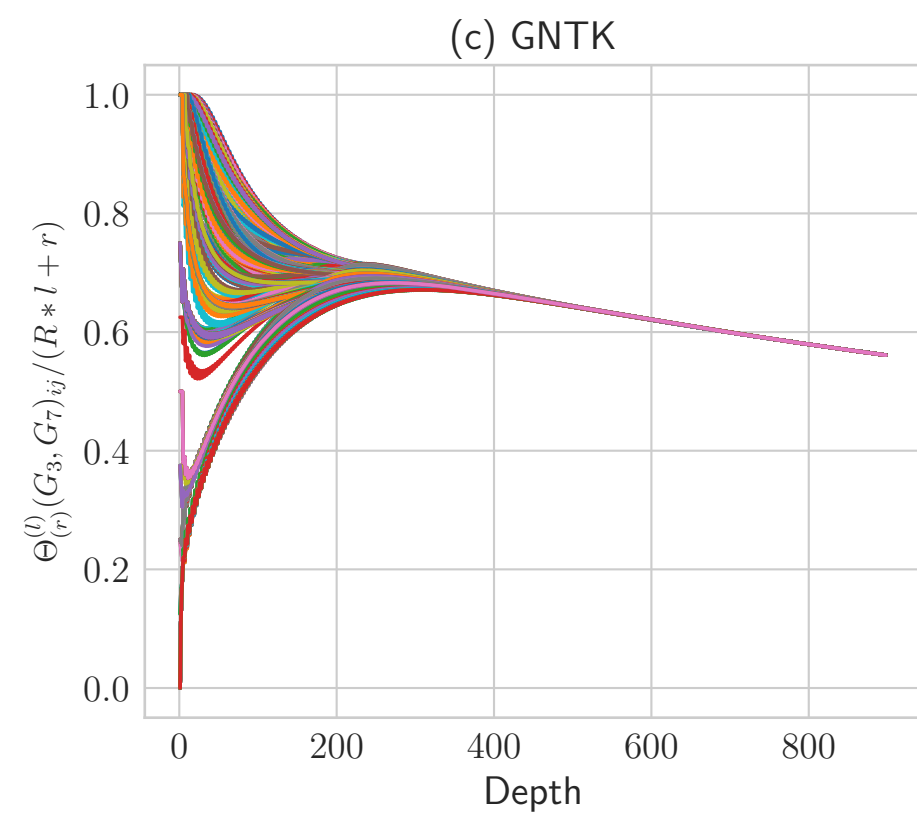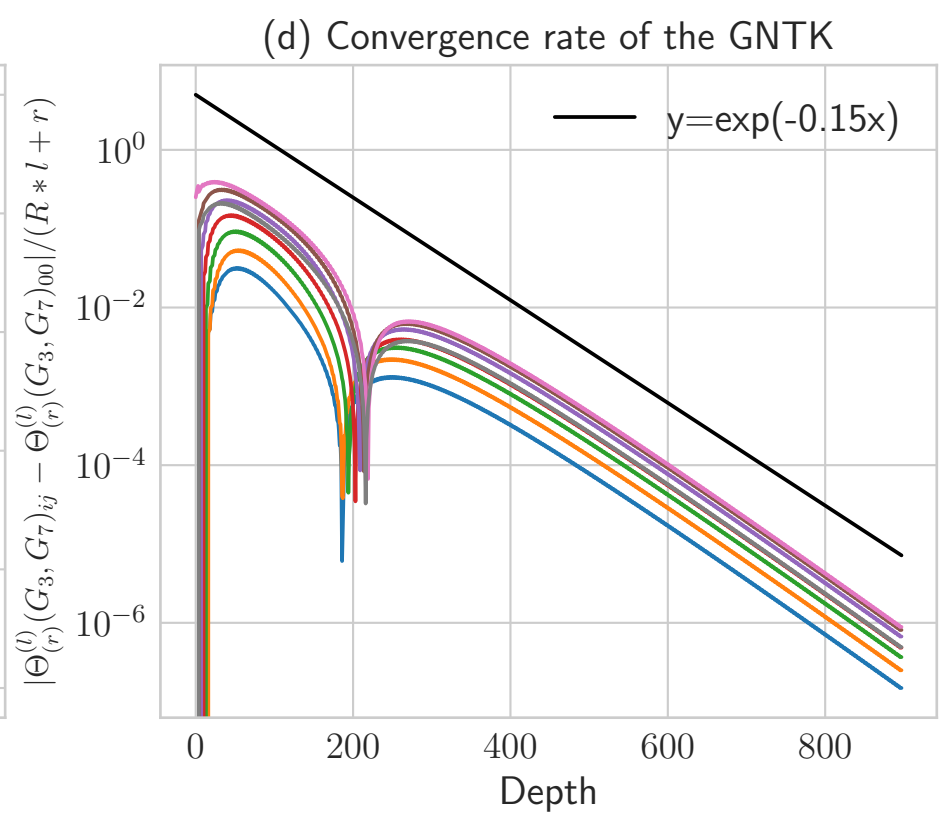

Supplement: supplementary_material [file attachment]

# Node Classification

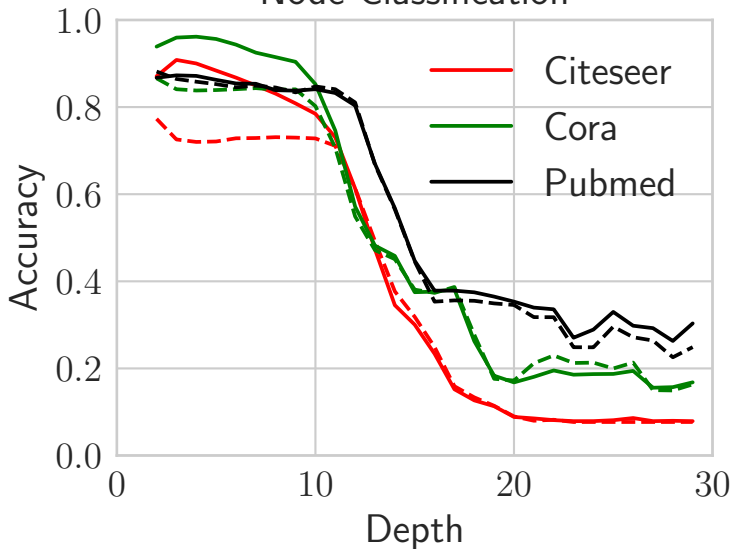

Supplement: supplementary_material [file attachment]

(a) GPK

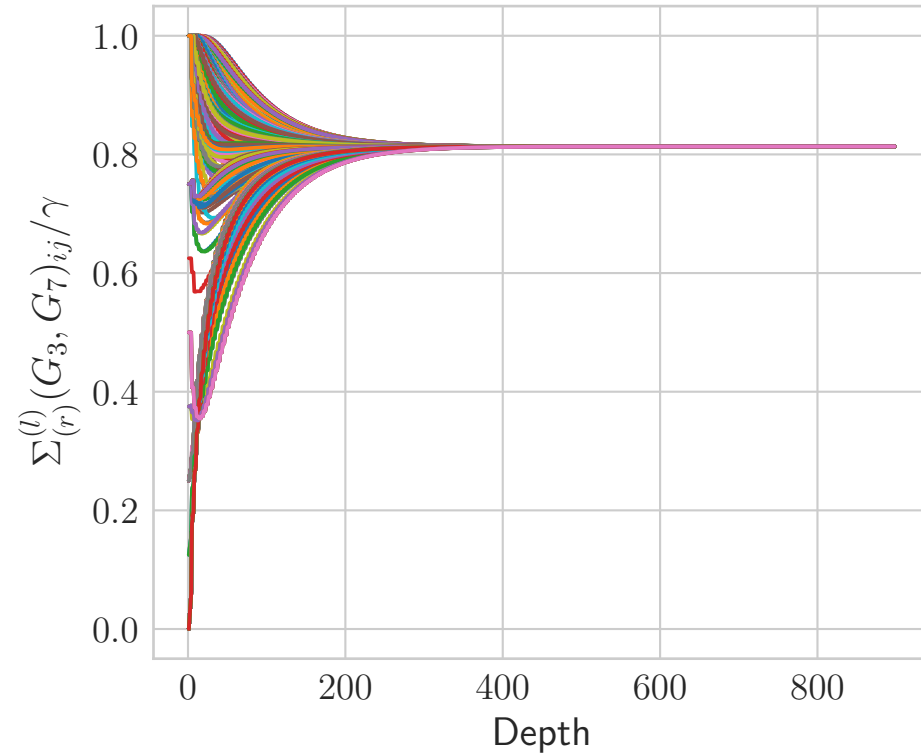

(b) Convergence rate of the GPK

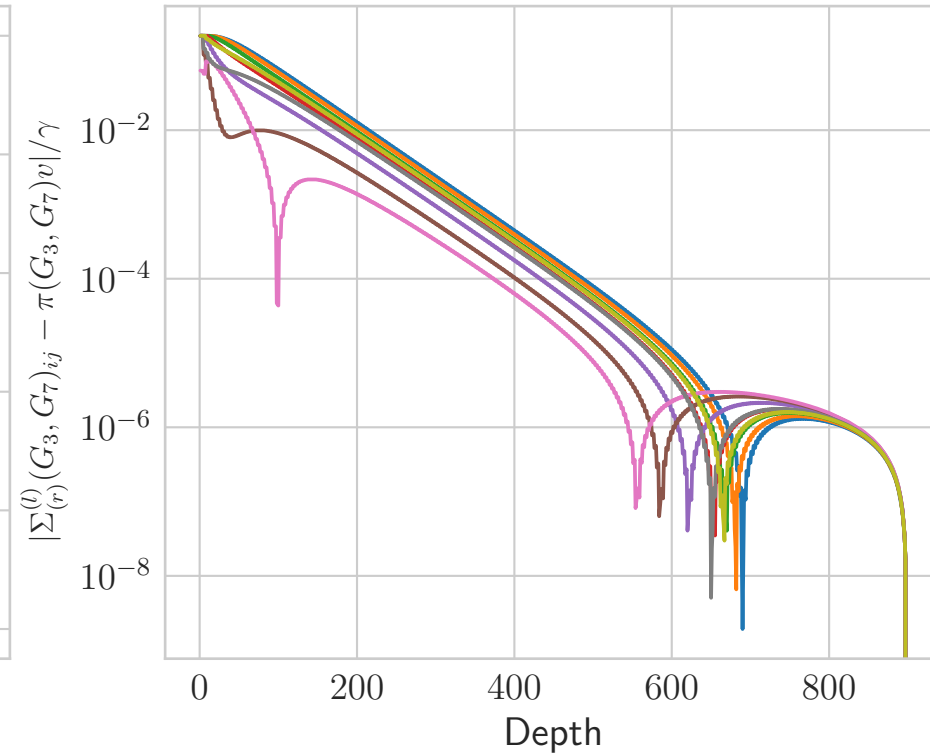

(c) GNTK

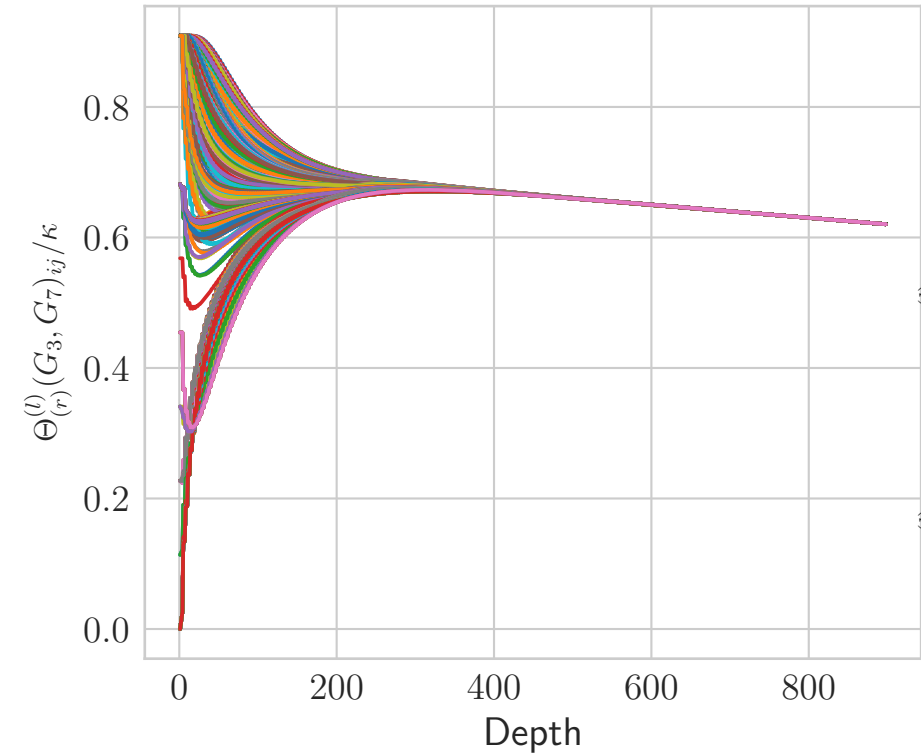

(d) Convergence rate of the GNTK

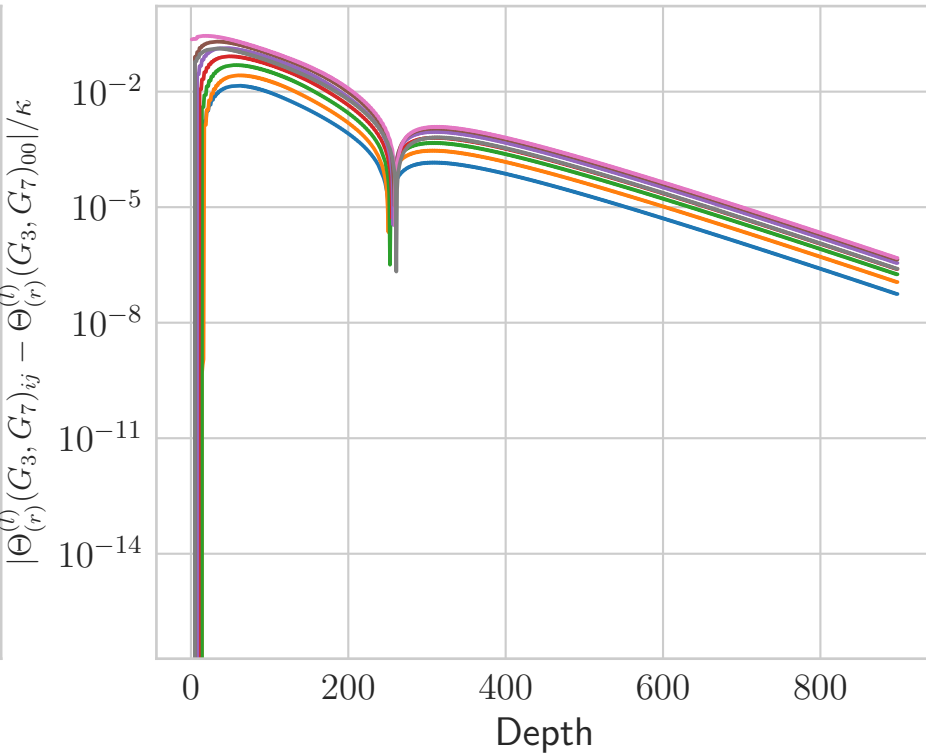

Supplement: supplementary_material [file attachment]
